# Supplementary material for: Performance of nanocrystalline Ni3N as a negative electrode for sodium-ion batteries
Source: Royal Society of Chemistry journal article supplement (doi:10.1039/c3ta00184a), 2013-01-01
Supplement: c3ta00184a.pdf [file c3ta00184a.pdf]

**Supplementary information file - Performance of nanocrystalline Ni<sub>3</sub>N as a negative electrode for sodium-ion batteries (Li, Hasan, Hector and Owen)**

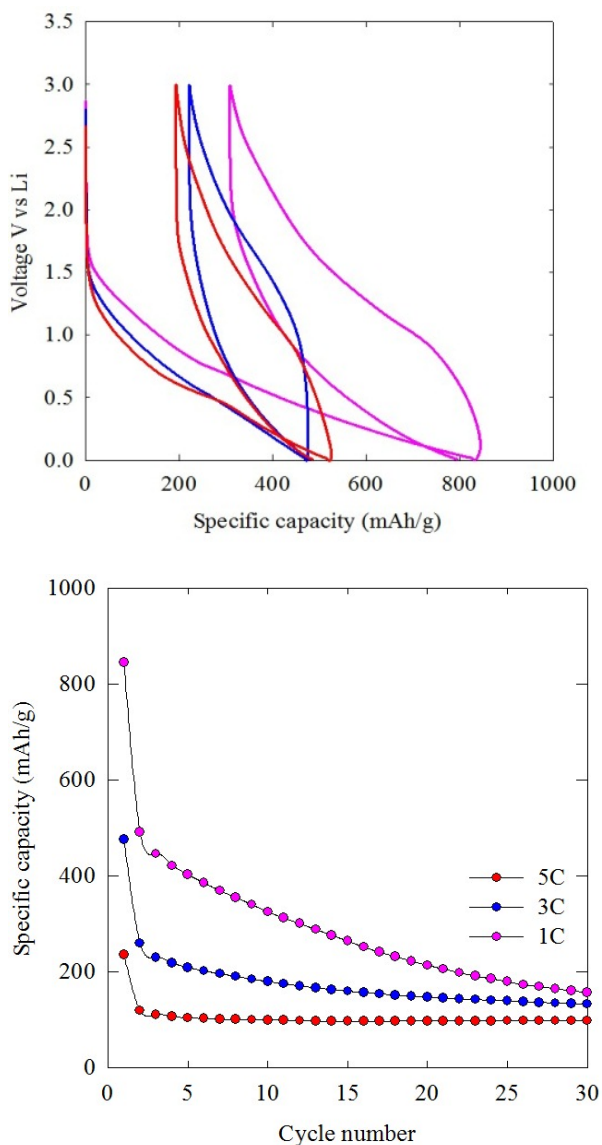

**Fig. S1** Voltage versus specific capacity (top) and reduction specific capacity versus cycle number (bottom) of Ni<sub>3</sub>N-lithium half cells cycled between 3 V and 1 mV at different current rates for 30 cycles (5C = 2115, 3C = 1269 and 1C = 423 mA<sub>g</sub><sup>-1</sup>). The counter electrode was lithium foil and the electrolyte was 1 M LiPF<sub>6</sub> in EC:DEC (1:1).

**Table S1** Refined parameters from Rietveld refinements of Ni<sub>3</sub>N

| Parameter (both patterns refined in P6 <sub>3</sub> 22 with Ni at <sup>1</sup> / <sub>3</sub> ,0,0 and N at <sup>1</sup> / <sub>3</sub> , <sup>2</sup> / <sub>3</sub> , <sup>1</sup> / <sub>4</sub> ) | Data from fit in Fig. 1(Ni <sub>3</sub> N obtained by ammonolysis of [Ni(NH <sub>3</sub> ) <sub>6</sub> ].2NO <sub>3</sub> ) | Data from fit in Fig. 2 (Ni <sub>3</sub> N obtained by ammonolysis of [Ni(EDA) <sub>3</sub> ].2NO <sub>3</sub> ) |
|-------------------------------------------------------------------------------------------------------------------------------------------------------------------------------------------------------|------------------------------------------------------------------------------------------------------------------------------|------------------------------------------------------------------------------------------------------------------|
| a / Å                                                                                                                                                                                                 | 4.62231(14)                                                                                                                  | 4.5937(4)                                                                                                        |
| c / Å                                                                                                                                                                                                 | 4.30630(13)                                                                                                                  | 4.3258(7)                                                                                                        |
| R <sub>wp</sub> / %                                                                                                                                                                                   | 13.0                                                                                                                         | 13.5                                                                                                             |
| R <sub>p</sub> / %                                                                                                                                                                                    | 9.1                                                                                                                          | 10.3                                                                                                             |
| Ni U <sub>iso</sub> × 100 / Å <sup>2</sup>                                                                                                                                                            | 0.23(7)                                                                                                                      | 2.93(15)                                                                                                         |
| N U <sub>iso</sub> × 100 / Å <sup>2</sup>                                                                                                                                                             | 1.00(-)                                                                                                                      | 7.2(15)                                                                                                          |
